# Supplementary material
Source: Springer Nature journal article supplement (https://www.springermedizin.de/resource/supplementary/12943_2013_1511_MOESM5_ESM.pdf/9552310)

Medulloblastoma IV

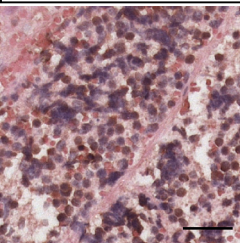

Cerebroma IV

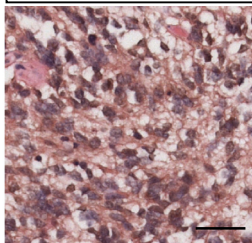

Meningioma IV

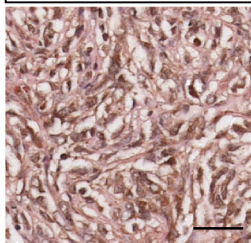

Ependymoma IV

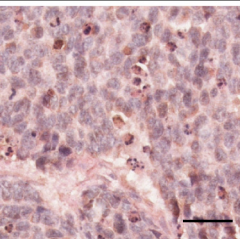

Undifferentiated IV

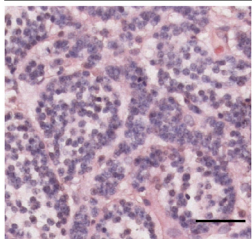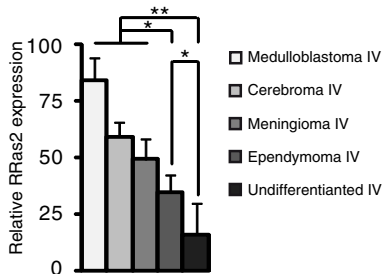

Supplement: MOESM5 [file 9552310]
